1 Title: Loss of embryonic neural crest cardiomyocytes causes adult hypertrophic cardiomyopathy

2

3 Authors: Sarah Abdul-Wajid, Bradley L Demarest, H Joseph Yost

4

5 Affiliations: Molecular Medicine Program, Eccles Institute of Human Genetics, University of Utah, Salt  
6 Lake City, United States

7

8 Abstract:

9 Neural crest cells migrate to the embryonic heart and transform into a small number of cardiomyocytes,  
10 but their functions in the developing and adult heart are unknown. Here, we map the fates of neural crest  
11 derived cardiomyocytes (NC-Cms) and genetically ablate them in embryogenesis in zebrafish. Specific  
12 NC-Cm ablation results in aberrant trabeculation patterns and altered Notch signaling, but is not  
13 detrimental to the development of the fish or early heart function. Strikingly, embryonic NC-Cm  
14 ablation results in adult fish that show severely hypertrabeculated hearts, altered cardiomyocyte size,  
15 diminished adult heart capacity and consequently poor physiological response to cardiac stress tests.  
16 Thus, we identify a novel developmental mechanism and genetic pathway that predisposes adults to  
17 hypertrophic cardiomyopathy and provides the first zebrafish model of adult-onset heart failure.

18

19 Main text:

20 Neural crest (NC) cells are a prototypical stem cell population, migrating from the developing neural  
21 tube and capable of transforming into a wide range of cell types during embryogenesis<sup>1</sup>, including  
22 cardiomyocytes in zebrafish<sup>2,3</sup>. In humans, syndromes such as diGeorge (22q11 deletion), CHARGE and  
23 Noonan/LEOPARD have defects in a variety of NC derived structures, including congenital heart

24 defects (CHDs): Tetralogy of Fallot, Truncus Arteriosus, ventricular septal defects, pulmonary stenosis  
25 and hypertrophic cardiomyopathy, implicating NC in human cardiac development<sup>4</sup>. However, it remains  
26 unclear whether neural crest-derived cardiomyocytes play a significant role in heart development and  
27 disease. The challenge has been to distinguish between primary contributions of NC to cardiac  
28 development and sequelae caused by defects in other tissues that subsequently impact cardiac  
29 morphogenesis and cardiac function. Distinguishing between global NC versus cardiac NC phenotypes  
30 could better inform our understanding of the genetic and developmental etiology of both CHD and adult  
31 heart disease. Previous studies have disrupted the cardiac NC population as a whole or different CHD  
32 gene candidates within the NC population and then characterized resulting cardiac phenotypes, often in  
33 the context of pleiotropic embryonic defects<sup>5-7</sup>. As an alternative and novel approach to decipher NC  
34 dependent cardiac phenotypes, we asked how specifically the NC derived cardiomyocyte (NC-Cms)  
35 population influences cardiac development and disease, by lineage mapping the NC-Cms and by  
36 genetically ablating NC-CMs during embryogenesis. This led us to discover the roles of NC-Cms in  
37 regulating the Notch pathway, in patterning trabeculation, and in causing predisposition to adult-onset  
38 hypertrophic cardiomyopathy.

39

#### 40 *Genetic identification of neural crest derived Cms (NC-CMs)*

41 Several methods have labeled NC before or during migration from the neural tube region and shown that  
42 a subset of labeled NC cells are found in the zebrafish heart that are co-labeled with heart-specific  
43 markers<sup>2,5,8</sup>. Conversely, we identified NC derived cardiomyocytes (NC-Cms) by genetically marking  
44 individual cells that express both neural crest specific genes and cardiomyocyte-specific genes. This  
45 dual-component expression both permanently marks the cell lineage and makes it available for  
46 temporally-regulated lineage-specific cell ablation (Fig.1A). We generated transgenic lines with a

47 cardiomyocyte-specific driver (*myl7*) of a transcript encoding floxed GFP-Stop followed by tagRFP  
48 fused cleavable (P2A peptide) and nitroreductase. Thus, when this transgene is recombined by Cre, it  
49 will express red fluorescence, and will allow the expressing cells to be ablated by metronidazole  
50 treatment at specific stages of development. This transgenic line was named *Cm:KillSwitch*.  
51  
52 In the absence of Cre-dependent recombination, *Cm:KillSwitch* expresses GFP exclusively in  
53 cardiomyocyte lineages (Extended Fig.1). The second transgenic component, called  
54 *Tg(sox10:Cre;cryaa:dsRed)*, is a *sox10* driver of Cre expression exclusively in the NC lineages, on a  
55 vector marked for selection with *cryaa:dsRed* for eye expression. We crossed heterozygous  
56 *Cm:KillSwitch* adults to heterozygous adults of *Tg(sox10:Cre;cryaa:dsRed)*, selected the offspring that  
57 were double-positive for dsRed eyes and GFP hearts (+RE+GFP, Fig.1A). In embryos that carry both  
58 transgenes, Cre recombination removes the GFP-Stop and allows expression of tagRFP-P2A-  
59 Nitroreductase only in NC-derived cardiomyocytes (NC-CMs), not in other NC lineages or in other non-  
60 neural crest derived cardiomyocytes. We found tagRFP+ cells in the heart at 24hpf (hours post  
61 fertilization, Fig.1B). These marked cells increased in number until 2dpf (days post fertilization), after  
62 which there was no significant increase in the number of NC-Cms ( $27\pm3$  to  $25\pm2$  cells from 2 to 4dpf,  
63  $n=3$  per time-point) or their proportional volume contribution in the developing heart (Fig.1B-I,  
64 Extended movie 1). These data indicate that NC-Cm contributes to approximately 10% of the total  
65 number of cardiomyocytes in the embryonic 2dpf zebrafish heart<sup>9</sup>. This contribution is early and  
66 achieves a steady state by 2 days of embryonic development.  
67  
68 The NC-Cms showed a consistent spatial distribution within the developing heart. NC-Cms localized to  
69 the apex of the ventricle, the outer curvature of the atrioventricular canal, and within the border of the

70 inflow tract (Fig.1J-M). In contrast, atrial NC-Cm spatial distribution did not appear as stereotypical as  
71 the ventricle. NC-Cm contribution to the inflow tract led us to ask whether the NC-Cms are also  
72 integrated into the secondary heart field and whether they contribute to the pacemaker cells of the  
73 developing heart<sup>10</sup>. The secondary heart field marker *Isl1/2* co-localized with NC-Cms in the proximal  
74 ventricle area and a single cell at the inflow tract, suggesting that NC-Cms may also contribute to a  
75 subset of pacemaker cells (Extended Fig.2).

76

### 77 *Ablation of NC-Cms*

78 To test the requirement of NC-Cms during heart development, we ablated them during their earliest  
79 appearance. Offspring from crosses of *Cm:KillSwitch* and *Tg(Sox10:Cre;cryaa:dsRed)* heterozygous  
80 parents were treated with either DMSO (0.5%, control) or 5mM Metronidazole (MTZ) from 30hpf to  
81 48hpf. Only those embryos that were double transgenic, as indicated by dsRed positive eyes and GFP  
82 positive hearts (+RE+GFP) were competent to respond to MTZ treatment and ablate the NC-Cms  
83 expressing Nitroreductase (Fig.2A). Two controls were included: Sibling embryos that were dsRed-eye  
84 negative but GFP positive, treated with MTZ, and double transgenic siblings (+RE+GFP) treated with  
85 DMSO. NC-Cm specific cell death was confirmed in +RE+GFP embryos treated with MTZ by  
86 immunostaining for activated Caspase-3, a marker of cell death. No significant cell death was observed  
87 in the two control groups (Extended Fig.3).

88

89 After treatment and subsequent washing at 48hpf, embryos were grown to 5dpf and hearts were  
90 analyzed by confocal microscopy. Importantly, no new tagRFP+ cardiomyocytes were observed three  
91 days after the ablation period, but an occasional extruding remnant of a tagRFP+ NC-Cm was detected  
92 (Fig.2B-D). These results indicate efficient ablation of the initial NC-CM population by 48hpf, and that

93 no new *sox10*-expressing cardiomyocytes were produced, either by subsequent waves of NC migration  
94 or by *de novo* expression of *sox10* in other cardiomyocyte lineages. While a previous study implicated  
95 two waves of cardiac NC migration to the heart, an early wave and a late (post 3dpf) wave<sup>5</sup>, our data  
96 suggest that any late waves of NC migration into the heart do not contribute to cardiomyocytes and/or  
97 do not express the NC marker *sox10*. Persistent (past 3dpf) *sox10* expression has only been reported in  
98 peripheral glia cells in zebrafish<sup>11</sup>, thus it is more likely that any later wave of *sox10* positive, NC  
99 derived cells do not transform into *myl7*-expressing cardiomyocytes.

100

#### 101 *NC-Cm ablated hearts have aberrant trabeculation*

102 Given that approximately 10% of the total number of early cardiomyocytes are NC-Cms, it was  
103 surprising that no gross morphological phenotypes were observed in the NC-Cm ablated embryonic  
104 hearts (+RE+GFP, MTZ treated) compared to control-treated hearts (Fig.2B-D). We found no  
105 significant differences in ventricle size or heart rate in NC-Cm-ablated embryos at 6dpf and juveniles at  
106 14dpf (Extended Fig.4), well beyond the age at which mutants with severe heart defects can survive<sup>12</sup>.  
107 However, ventricles of the NC-Cm deficient hearts had a subtle internal defect compared to controls.  
108 Analysis of confocal slices of the ventricles from NC-Cm ablated hearts at 5dpf demonstrated an  
109 unusual disarray of trabeculation compared to control hearts (Fig.2E). We quantified this phenotype by  
110 measuring the angle of the primary branch of the trabeculae as they contact the inner ventricular surface  
111 proximal to the atrioventricular canal (Fig.2E bottom panel, Extended Fig.5). The position of each  
112 trabecula was measured relative to the anterior-posterior coordinate position (0 to 1.0) in the ventricle  
113 (Fig.2E). A significant difference was found in the trabeculation pattern of the NC-Cm ablated hearts  
114 compared to both sets of controls (Fig.2F).

115

116 *NC-Cm relation to Notch regulation of trabeculation*

117 Notch signaling is an important regulator of trabeculation during heart development. A recent report  
118 demonstrates that Notch activated cardiomyocytes signal to their immediate neighbors to trigger the  
119 initiation of trabeculation in the neighboring Notch-negative cardiomyocyte<sup>13</sup>. Given the aberrant  
120 organization of trabeculation patterns in NC-Cm-ablated hearts, we explored the spatial relationship of  
121 Notch signaling and NC-Cms by crossing a *sox10* reporter line *Tg(sox10:tagRFP)* with the Notch  
122 signaling reporter line *Tg(TP1:d2GFP)* and examined the resultant embryonic hearts by confocal  
123 microscopy<sup>14</sup>. Transiently tagRFP labelled NC-Cms were not co-incident with Notch activated cells;  
124 cells were not found to co-express both reporters (Fig.3A). Instead, NC-Cms in the ventricle were  
125 immediately adjacent to Notch activated cardiomyocytes (Fig.3A, white arrows). This result suggests  
126 that the NC-Cms could be the Notch ligand providing cells, which trabeculate, as described in the  
127 previous model, and as illustrated in Figure 1D. Therefore, we asked whether *Jag2B*, which is thought to  
128 signal to Notch activated cells, and *Erb2*, which is involved in repression of trabeculation<sup>13,15</sup>, are  
129 disrupted in NC-Cm ablated hearts.

130

131 Isolated, embryonic 4dpf hearts from NC-Cm ablated fish and their sibling controls were used for  
132 quantitative PCR analysis of *erbb2* and *jag2b*. *Jag2B* was downregulated in NC-Cm ablated hearts while  
133 *myl7* and *nrg2a* expression were not significantly changed compared to treated, control hearts (Figure  
134 3B). *Erb2* expression was not significantly affected in NC-Cm ablated hearts compared to control  
135 hearts, perhaps because the expected increase in *erbb2* expression, upon NC-Cm and Notch signaling  
136 disruption, is counteracted by the loss of *erbb2* expression from the NC-Cms themselves in NC-Cm  
137 ablated hearts<sup>16</sup>. Together, these data support and extend the current Notch/Neuregulin model of cardiac

138 trabeculation, and lead us to propose that the NC-Cms are critical for the correct patterning of  
139 ventricular trabeculation by providing a unique cellular source of Jag2B (Figure 3C).

140  
141 *Embryonic ablation of NC-Cms predisposes adults to heart failure*

142 Ablation of NC-Cms resulted in a subtle but consistent trabeculation defect in embryos and juveniles but  
143 did not diminish viability, and the embryos grew to adulthood (n=16/20 for MTZ treated –RE+GFP  
144 controls compared to n=20/22 for MTZ treated +RE+GFP siblings). The effects of altered embryonic  
145 trabeculation on adult cardiac structure and physiology have not been reported. We grew the NC-Cm  
146 ablated embryos and sibling controls to adulthood and analyzed their hearts by whole mount  
147 fluorescence imaging. Control hearts had large patches of tagRFP+ NC-Cms in the apex of the heart,  
148 indicating that NC-CM lineages persisted into adulthood, with similar topological distribution (Fig.4A),  
149 and confirmed by flow cytometry (Extended Fig.6). The embryonically ablated NC-Cm hearts  
150 (+RE+GFP, MTZ treated), had negligible tagRFP fluorescence in the heart, indicating that no  
151 subsequent (post 2dpf) contributions of NC cell lineages persisted in the heart into adulthood, and that  
152 *de novo sox10* expression did not occur after the initial embryonic NC-Cm contribution (Fig.4C;  
153 confirmed by FACs Extended Fig.6). Remarkably, sections of the NC-Cm-ablated hearts revealed a  
154 massive hypertrabeculation (Fig.4D-F), more substantial than that predicted by the subtle alterations in  
155 the patterning of embryonic trabeculation. Trabeculation was quantified by determining the percentage  
156 of area in a ventricle section covered in trabeculae, which was ~70% in control hearts and ~85% in NC-  
157 Cm ablated hearts (Fig. 4G). This measurement is inversely correlated with the luminal area that is  
158 available for blood flow through the ventricle, which was decreased two-fold, from 30% in controls to  
159 15% in NC-Cm ablated hearts.

160

161 This hypertrabeculation phenotype is analogous to hypertrophic cardiomyopathy in humans, which can  
162 be due to either increased cardiomyocyte size, increased cardiomyocyte cell number or both<sup>17,18</sup>. We  
163 therefore quantified cardiomyocyte number and size in NC-Cm ablated adult hearts compared to control  
164 siblings. Using Mef2 antibody staining along with DAPI to specifically demarcate cardiomyocyte nuclei  
165 in ventricle sections of the adult hearts, we found no significant difference in the number of  
166 cardiomyocytes per trabeculae area in NC-Cm ablated hearts compared to their control siblings (Figure  
167 4H-J, Extended Fig7A). To determine if cell size was altered, ventricles from treated and control adults  
168 were isolated, dissociated into single cells and cultured in chamber slides for 24 hours to allow  
169 adherence of dissociated single cardiomyocytes. The cells were then fixed and stained for GFP and  
170 DAPI and GFP positive cardiomyocytes were imaged and analyzed for cell area. Cardiomyocytes from  
171 NC-Cm ablated ventricles were significantly larger in area than their sibling control cardiomyocytes and  
172 this increase in area was most likely because of their significant increase in overall cell length (Extended  
173 Fig.7B-D,  $n \geq 25$  cells per condition,  $p=0.02$  for area and  $p=0.03$  for length measurements). This result,  
174 increase in cardiomyocyte size versus number in NC-Cm ablated hearts, was also confirmed by flow  
175 cytometry analysis of dissociated ventricles from NC-Cm ablated adults and sibling controls (Extended  
176 Fig.8). Together, these results indicate that increased cardiomyocyte size contributes to the  
177 hypertrabeculation/ hypertrophic cardiomyopathy phenotype in adults raised from NC-Cm ablated  
178 embryos.

179

180 Because the NC-Cm ablated hearts were dramatically hypertrabeculated, with diminished lumen volume  
181 for blood flow, we asked whether embryonic ablation of NC-Cms had an impact on adult cardiac  
182 function. NC-Cm ablated adults and sibling controls were subjected to a cardiac stress test via a swim  
183 tunnel assay, in which adult fish are challenged with step-wise increases in water speed, analogous to



184 step-wise increases in treadmill speed in stress-tests of human adult cardiology patients. The swim  
185 tunnel assay measures the critical water speed at which individual fish fatigue in swimming (Extended  
186 Movie 2). NC-Cm ablated adults performed significantly poorer in the swim tunnel assay than their  
187 sibling controls and fatigued at much lower water speeds (Fig.4K, 4L). These results indicate that early  
188 and subtle defects in embryonic heart development, dependent on NC-Cm lineages, can predispose  
189 adults to performance-induced heart failure.

190

191 Overall these findings demonstrate previously unknown roles for NC derived cardiomyocytes, using  
192 unique lineage labeling and genetic ablation approaches. Importantly, the hypertrophic cardiomyopathy  
193 and heart failure in adults and aberrant trabeculation patterning in embryos can only be attributed to the  
194 post-migratory NC-derived cardiomyocytes in our study. This is in striking contrast to previous studies  
195 that arbitrarily ablated embryonic ventricular cardiomyocytes and reported no consequential effects on  
196 subsequent embryonic heart regeneration, function and trabeculation formation<sup>19,20</sup>. Our study  
197 demonstrates that the NC-Cms are not a replaceable cardiomyocyte population, unlike other  
198 cardiomyocytes of the heart, and supply a required, innate function of regulating trabeculation in the  
199 ventricle in the embryo and cardiac structure and function in adulthood. An additional observation from  
200 our results is that while the NC-Cm function in trabeculation is required, the ventricle is still capable of  
201 maintaining its' steady state population of cardiomyocytes, as we found no significant difference in  
202 cardiomyocyte quantity despite the ~10% loss of cardiomyocytes by NC-Cm ablation. Previous attempts  
203 to analyze the consequences of NC ablations reported changes in embryonic ventricle morphology, heart  
204 rate and other defects that we did not observe<sup>3,5,21</sup>. Those reported effects were likely due to secondary  
205 effects of perturbation of other NC-derived lineages that contribute to other embryonic structures such as

206 aortic arches or endocardium, resulting in pleiotropic phenotypes that can have secondary effects on  
207 heart function<sup>5,8,21</sup>.

208

209 Our findings extend and clarify the roles of Notch/Neuregulin regulated trabeculation in the ventricle  
210 during embryonic development. Previous models did not suggest mechanisms by which certain  
211 cardiomyocytes were pre-patterned to express Notch signals, which then subsequently trigger  
212 neighboring cells to Notch activation and suppression of trabeculation<sup>13</sup>. From our observations of NC-  
213 Cm lineage distribution in the ventricle in relation to Notch-responding cardiomyocytes, and the results  
214 of altered Notch ligand expression and altered patterning of trabecula in NC-Cm ablated hearts, we  
215 suggest that NC-Cms serve as a pre-specified source of Jag2B presentation in the 3dpf ventricle, which  
216 then impacts the spatial patterning of trabeculation. Thus, in the absence of NC-Cms, normally patterned  
217 presentation of Jag2B is diminished and trabeculae are disorganized. While NC-Cms are not known to  
218 comprise a significant portion of the mammalian cardiomyocyte population<sup>22-24</sup>, their roles in the  
219 patterning of trabeculation and in adult heart function have not been explored. In humans, the etiologies  
220 of hypertrophic cardiomyopathy and heart failure are unknown<sup>17</sup>, and our study proposes a novel neural  
221 crest derived cardiomyocyte (NC-CM) component. Our results also suggest that the hypertrophic  
222 cardiomyopathy phenotype prevalent in the NC disease, Noonan' syndrome, could be a direct a  
223 consequence of perturbation of the NC-Cm population<sup>25,26</sup>. If NC function is more broadly affected than  
224 just NC-Cms, other non-cardiac phenotypes will also present, such as in the range of neurocristopathies  
225 that are clinically evident. However, if just NC-CMs or the genetic regulatory pathways expressed  
226 therein are more specifically altered, either by mutation or by developmental defects, individuals could  
227 have subclinical defects that only become apparent as stress-induced adult-onset heart failure. Further  
228 studies of the genetics and developmental regulatory mechanisms of NC-Cms will inform our

229 understanding of the various presentations of CHDs, their relation to and their roles in adult cardiac

230 function.

231

232 Figures and Legends:

233 Figure 1.

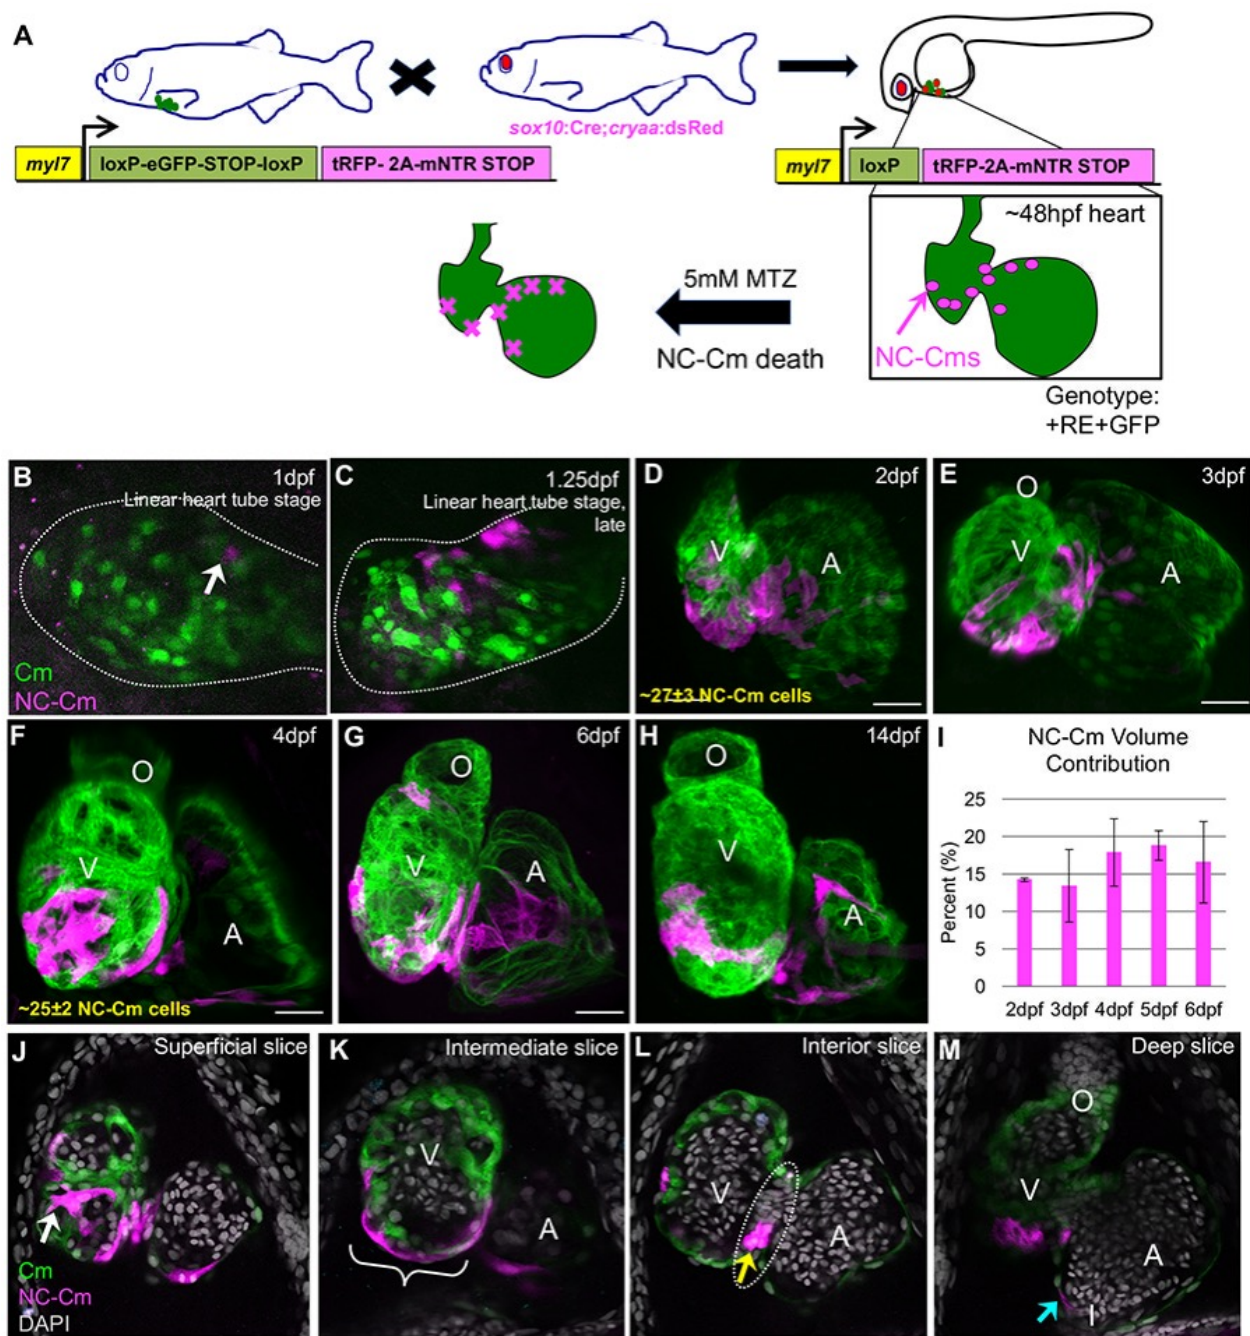

234

235 Figure 1. NC-Cm during heart development. A) Schematic of the NC-Cm lineage labeling and ablation

236 setup using the *Cm:KillSwitch* transgenic (*myl7*-driven transgene) crossed to the NC driver

237 *Tg(sox10:cre;cryaa:dsRed)*. Metronidazole (MTZ) treatment causes mNTR-expressing cells to die, i.e.

238 NC-Cms switched to express tagRFP+ and mNTR. B-H) Contribution of NC-Cms to the developing  
239 heart over time. Confocal maximum intensity images of each development stage (1-14dpf). On average,  
240  $27 \pm 3$  NC-Cms were found at 2dpf and this number did not significantly increase by 4dpf ( $25 \pm 2$  NC-  
241 Cms). Quantification was from confocal 3D stack images at indicated timepoints and from three  
242 individuals. Dotted line outlines heart tube. I) Graph displays average percent of total cardiomyocyte  
243 volume contributed by tagRFP cardiomyocytes (NC-Cms) at indicated developmental times; three or  
244 more individual hearts at each time point. Error bars are standard deviation. J-M) Confocal slices of a  
245 4dpf heart from NC-Cm lineage labelled embryos. White arrow indicates trabeculating NC-Cm. Bracket  
246 denotes the apex of the ventricle. Dashed line indicates the AV canal and the yellow arrow indicates the  
247 couple of NC-Cms found on the outer curvature of the AV canal. Blue arrow indicates the NC-Cm  
248 found at the border of the inflow tract. O=outflow tract, V=ventricle, A= atrium. Scale bar is 30uM.  
249 Images are representative of  $n \geq 3$ .  
250

251 Figure 2.

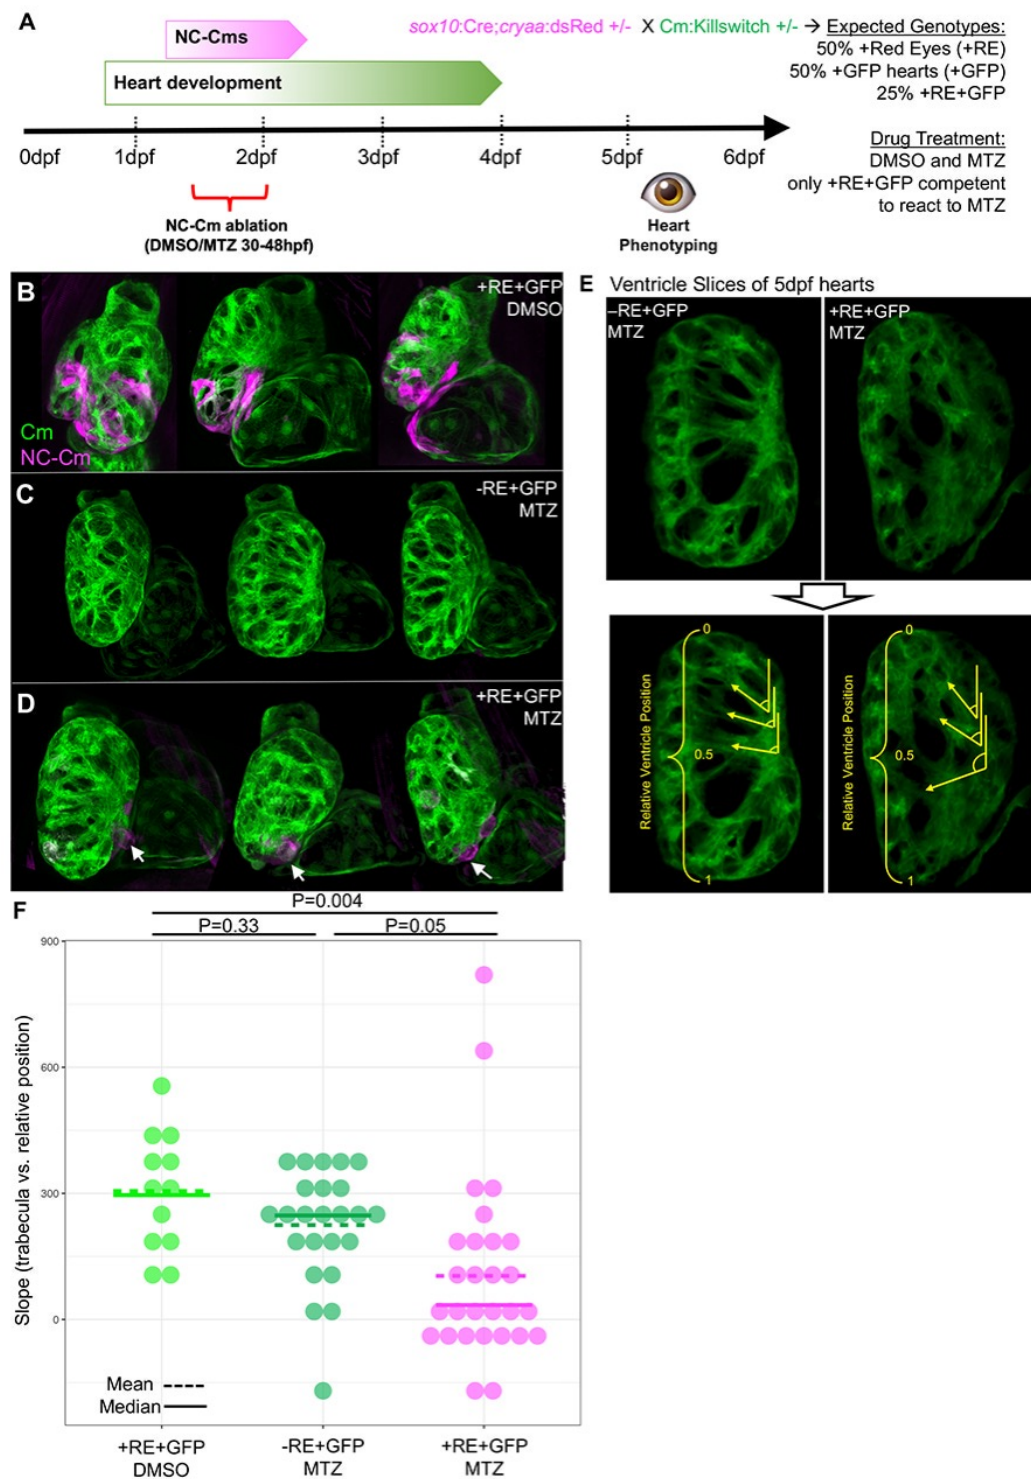

252

253 Figure 2. NC-Cm ablation and heart development. A) Schematic of NC-Cm ablation protocol.

254 Transgenic, heterozygous adults for *Cm:KillSwitch* and *Tg(sox10:cre;cryaa:dsRed)* were crossed to



255 generate a pool of siblings with three transgenic genotypes: only *Cm:KillSwitch* positive (+GFP);  
256 *Tg(sox10:cre:cryaa:dsRed)* positive (+RE); or both (+RE+GFP). Embryos that were positive for both  
257 transgenes were treated with either DMSO (control) or MTZ from 30-48hpf. Only this double-transgenic  
258 genotype was competent to respond to NC-Cm ablation by MTZ. Sibling embryos that were only  
259 positive for *Cm:KillSwitch* (-RE+GFP) were also treated with MTZ as a drug control. After treatment,  
260 embryos were phenotyped at 5dpf. B-D) Results of control and NC-Cm ablation in 5dpf hearts.  
261 Confocal maximum intensity projection images from three hearts from each condition. NC-Cm  
262 detection by tagRFP fluorescence was largely absent from the MTZ treated +RE+GFP embryos  
263 compared to their DMSO treated sibling controls (D compared to B). White arrows indicate a remnant,  
264 extruding NC-Cm as a consequence of cell death. E) Trabeculation analysis of NC-Cm ablated hearts.  
265 Confocal slices of embryos subject to NC-Cm ablation as in A) were analyzed for trabeculation patterns.  
266 Control hearts had an array of trabeculae with primary branches arranged along anterior-posterior  
267 coordinate. In contrast, NC-Cm ablated ventricles had poorly organized trabeculae (E upper panel left  
268 compared to right). The angle of the primary branch of a trabecula and relative anterior-posterior  
269 position of the primary branch within the ventricle were measured (E bottom panel, yellow arrow lines  
270 depict a primary trabecula branch and relative position in ventricle is represented by yellow bracket).  
271 The position and angle of the primary trabeculae branches were measured relative to the AV canal.  
272 These data were collected for controls and NC-Cm ablated hearts (+RE+GFP, MTZ treated) and a slope  
273 was computed using the trabecula angle to position data for each individual heart (see Extended Figure  
274 5). F) Computed slope values for individual hearts in each condition. Mean is indicated by the dashed  
275 line and median by the solid line. The slope measurement was significantly different for NC-Cm ablated  
276 hearts compared to their sibling controls. P-values computed by TukeyHSD on  
277 ANOVA( $F(62,60)=3.31$ ).

278 Figure 3.

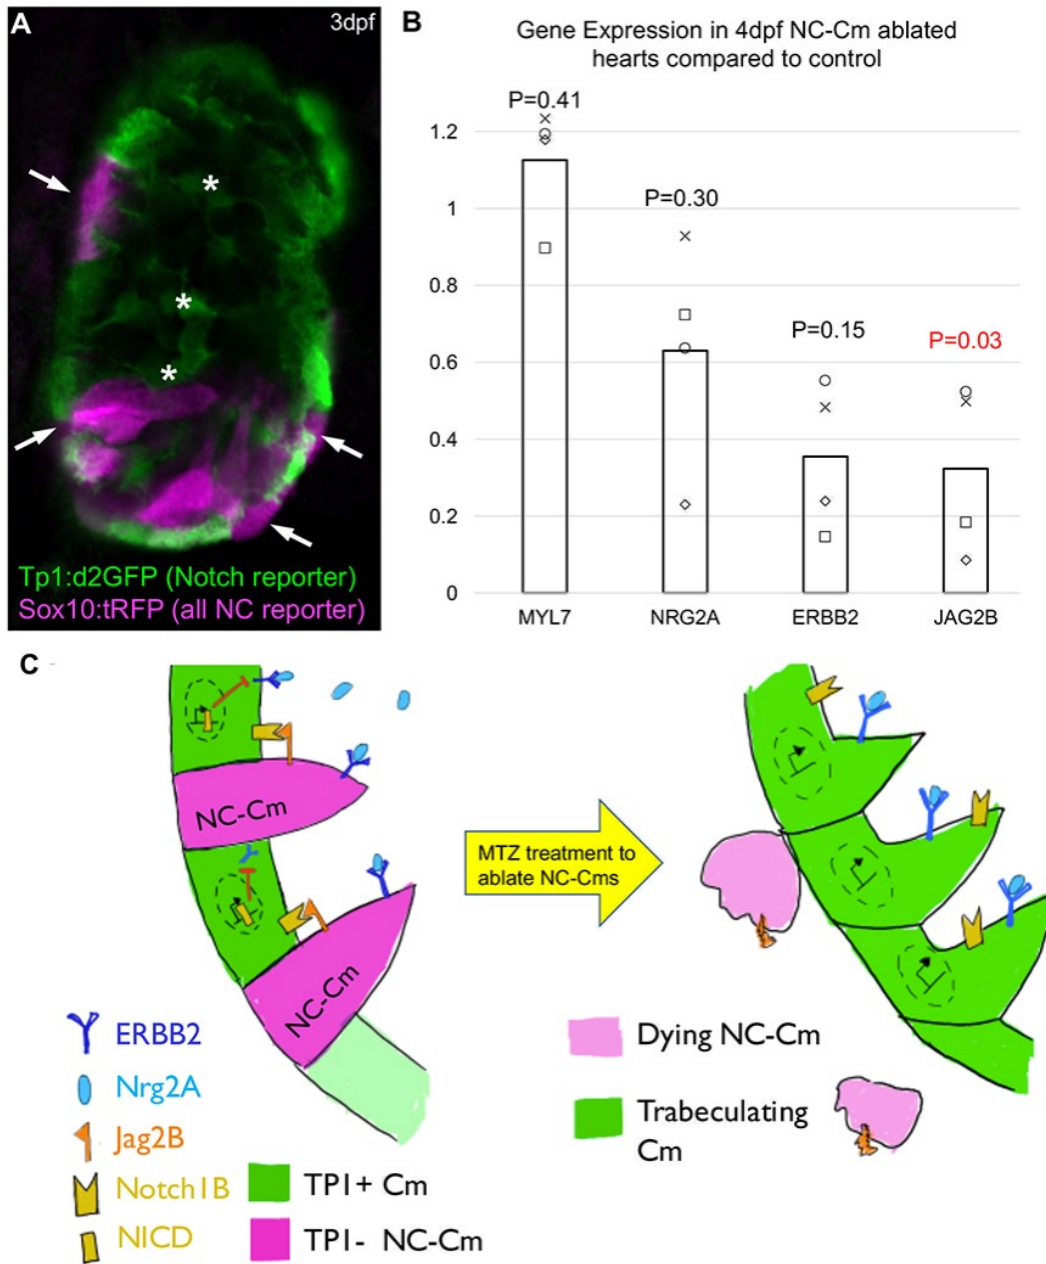

279

280 Figure 3. NC-Cm cells regulate Notch signaling during trabeculation. A) Ventricle section of a 3dpf  
 281 embryo from a *sox10:tagRFP* transgenic line crossed with the Notch reporter *Tp1:d2GFP* line. NC-  
 282 derived lineages (*tagRFP*) did not show high levels of Notch response (*d2GFP*). Arrows indicate  
 283 trabeculating, *sox10*+ cardiomyocytes i.e. NC-Cms that were next to a Notch activated cardiomyocyte.  
 284 Internal, rounded GFP+ cells are Notch activated endocardial cells (white asterisk). B) qPCR gene



285 expression of isolated 4dpf hearts from NC-Cm ablated and control siblings. Values are delta delta Ct  
286 computations. Bars represent average of four biological replicates. Points are individual experiments.  
287 Delta Ct values were normalized to Rpl11 expression and used to compute standard t-test significance  
288 (P-values shown) between NC-Cm ablated and Control delta Ct values. C) Schematic model in which  
289 NC-Cms provide spatial patterning of trabeculation, utilizing components of Notch/Neuregulin  
290 pathways in adjacent cardiomyocytes not derived from neural crest.  
291

292 Figure 4.

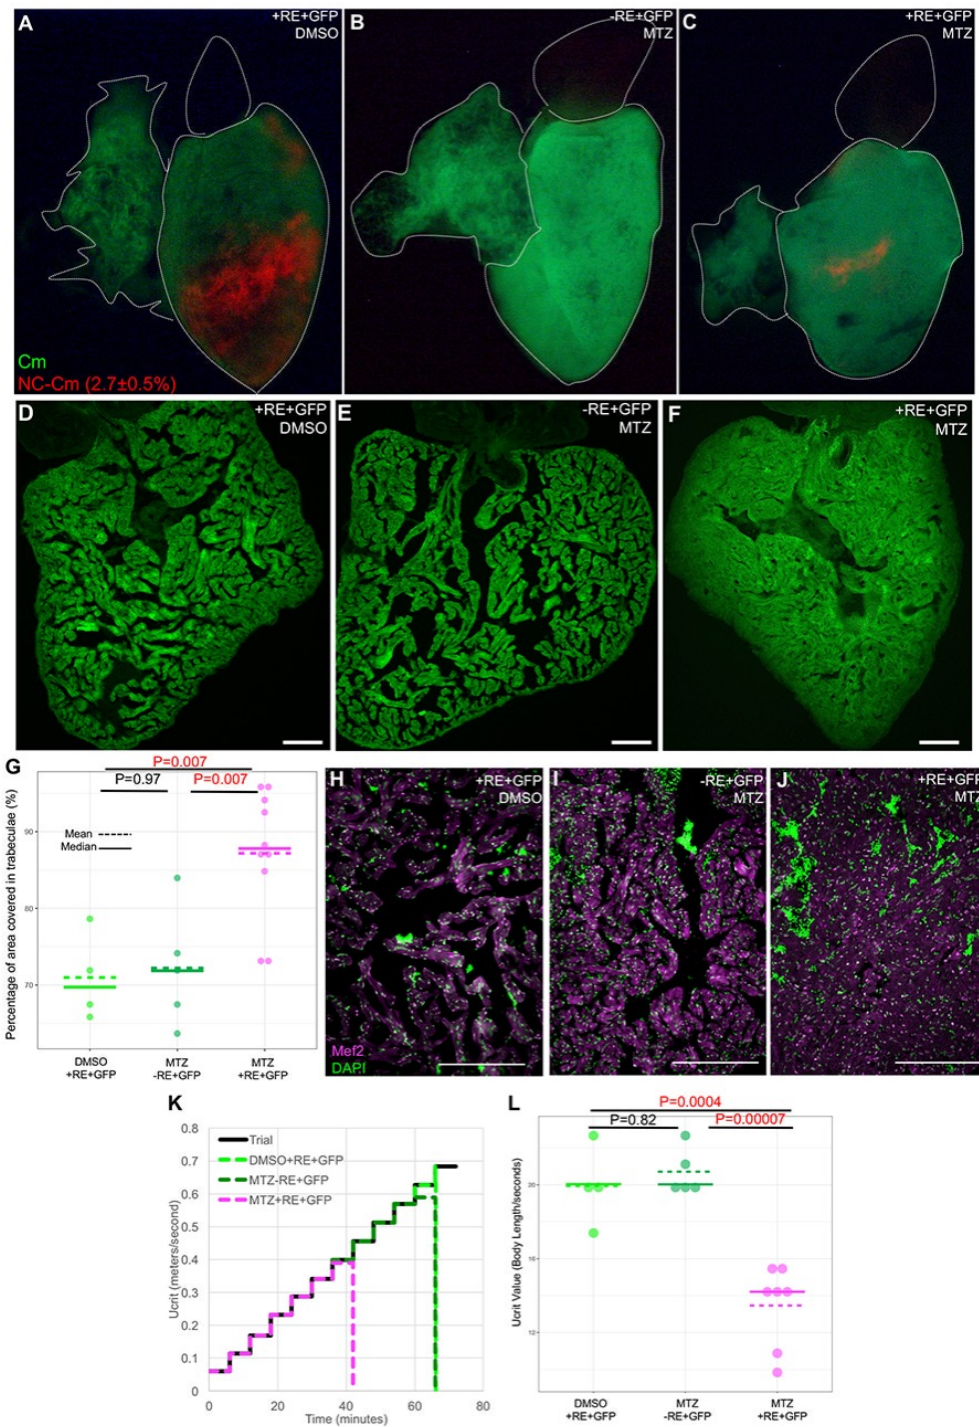

293

294 Figure 4. Ablation of NC-Cms during embryogenesis results in hypertrabeculated non-compaction

295 cardiomyopathy and heart failure in adults. A-C) Whole mount fluorescent images of hearts isolated

296 from adult zebrafish (4-month-old) generated from embryonic NC-Cms ablation experiments, as in  
297 Figure 2A. Numbers represent percent of total (GFP+) cardiomyocytes, not total heart cells, quantified  
298 by flow cytometry (FACS) of dissociated, individual +RE+GFP, untreated adult hearts (see Extended  
299 Figure 6). D-F) Fluorescent microscopy sections of hearts from sibling individuals as in A-C. scale bar  
300 = 100uM. G) Quantification of area of ventricle covered in trabeculae from sections similar to D-F. Dots  
301 represent sibling individuals from each condition pooled from biological replicates. Solid line = median  
302 of data, dashed line = mean. P values computed by TukeyHSD on ANOVA ( $F(2,16)=9.48$ ). H-J)  
303 Microscopy sections of ventricles stained with Mef2 and DAPI. Nuclei that are both Mef2 and DAPI  
304 positive were used to count the number of cardiomyocytes per trabeculae area (see Extended Fig7A).  
305 Scale bar = 200uM. K) Swim trial assay with incremental speed increases of 0.05m/s every 6 minutes  
306 (solid black line). Average assay results for DMSO control (light green, n=4), MTZ control (dark green,  
307 n=5) and NC-CM ablated (magenta, n=8) adults. Sibling males were used as controls and data shown  
308 are amalgamated from multiple biological replicates. See Extended Movie 2. L) Individual Ucrit results  
309 normalized to body length from assay in H. Dots represent individual males from each condition. Solid  
310 line = median of data, dashed line = mean. P values computed by TukeyHSD on ANOVA  
311 ( $F(2,13)=24.65$ ).

312

313 Extended Figure 1.

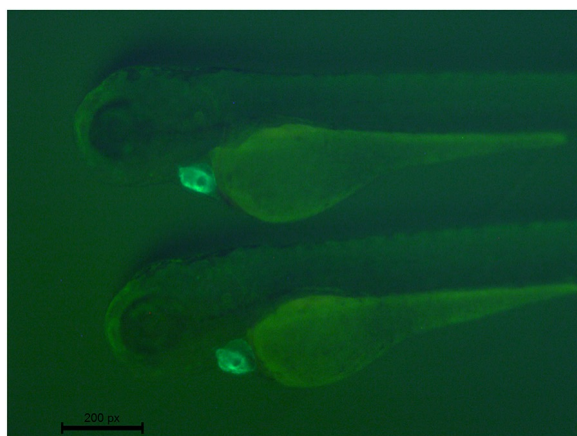

319

320

321

322

323

324

Extended Figure 2.

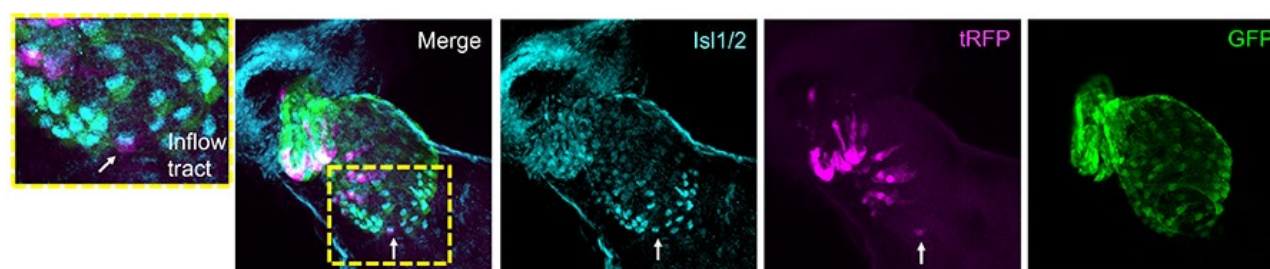

320

321

322

323

324

Extended Figure 2. Isl1/2 antibody staining co-localizes with some NC-Cms indicating integration of neural crest cells into anterior second heart field. Arrow indicates single NC-Cm in the inflow tract that is positive for Isl1/2, a marker of pacemaker cells<sup>27</sup>. tagRFP and GFP were detected by immunolabeling.

Extended Figure 3.

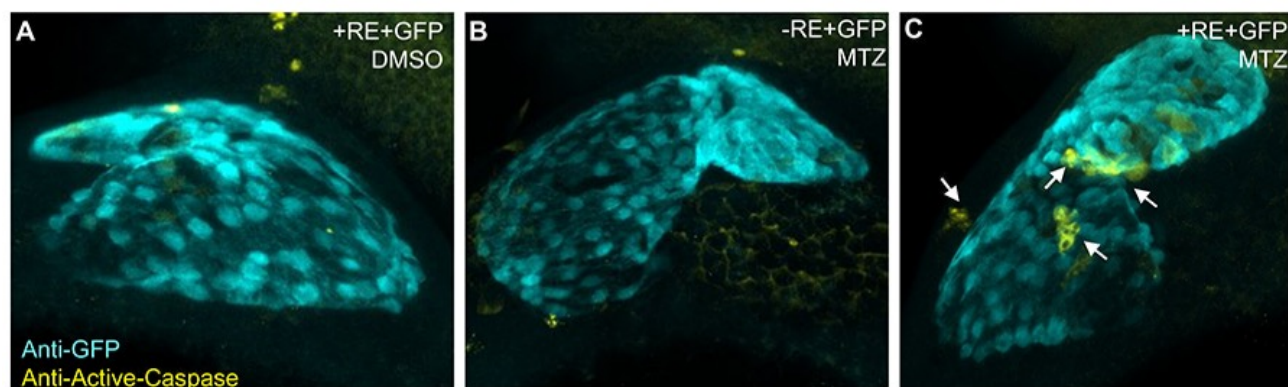

325

326 Extended Figure 3. Cell death in NC-CMs after MTZ treatment. Embryos derived from transgenic  
327 crosses as described in Figure 1 and 2A. A) Control: DMSO treated double transgenic siblings. B)  
328 Control: MTZ treated single transgenic siblings. C) MTZ treated double transgenic (+RE+GFP) had  
329 positive staining for Active Caspase 3, indicative of cell death (arrows), that was not observed in hearts  
330 from controls.

331

332 Extended Figure 4.



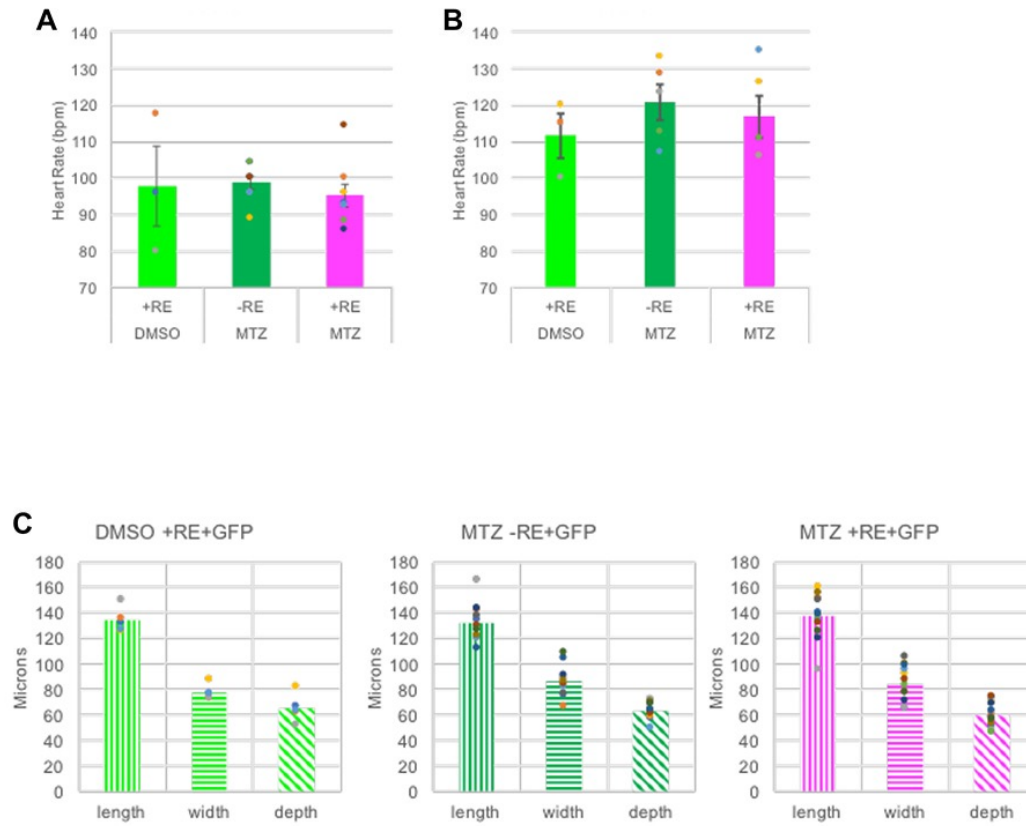

333

334 Extended Figure 4. NC-Cm ablation has no significant effect on embryonic and juvenile heart rate or

335 size. Heart rate (A) in 6dpf embryos and (B) in 14dpf juveniles. C) Ventricle dimension measurements

336 from controls and MTZ treated siblings.

337

338

339 Extended Figure 5.

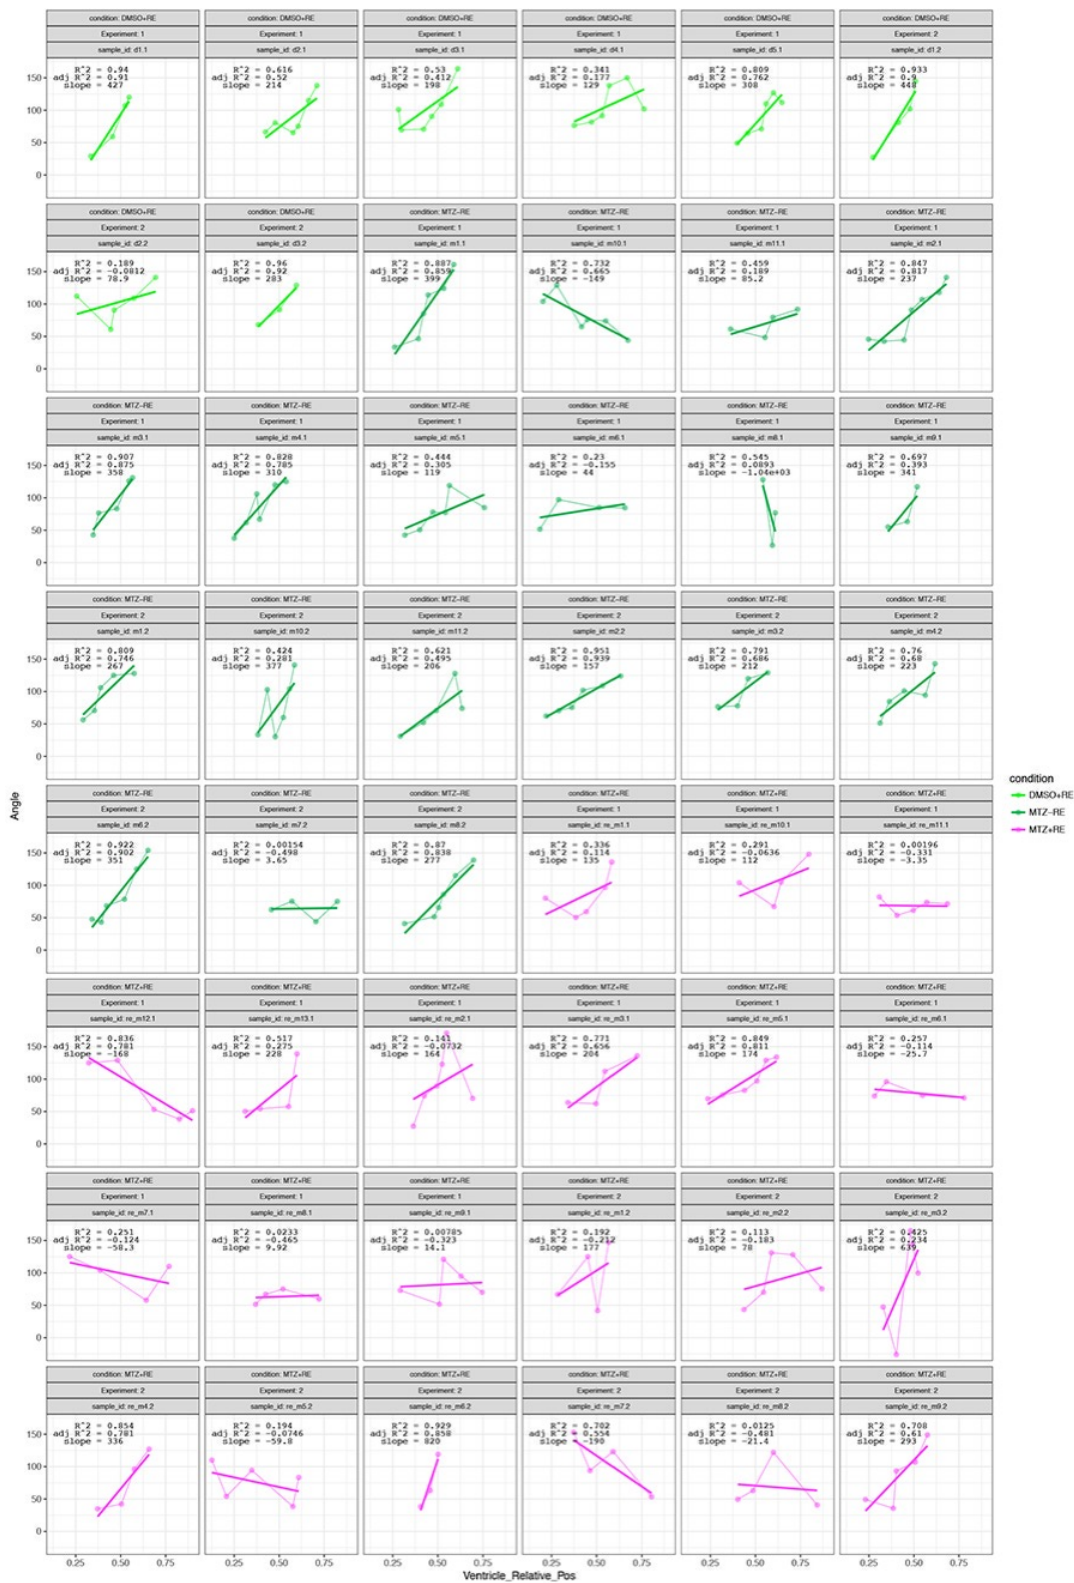

340

341 Extended Figure 5. Slope calculations from angle and anterior-posterior position measurements of  
342 trabeculae in individual hearts from experiments described in Figure 2. Each plot is an individual heart.  
343 Light green is DMSO +RE+GFP, dark green is MTZ -RE+GFP and magenta is MTZ +RE+GFP  
344 conditions. Data shown are from one biological replicate. Similar quantification was done for two other  
345 biological replicates and shown in sum in Figure 2F.

346

347 Extended Figure 6.

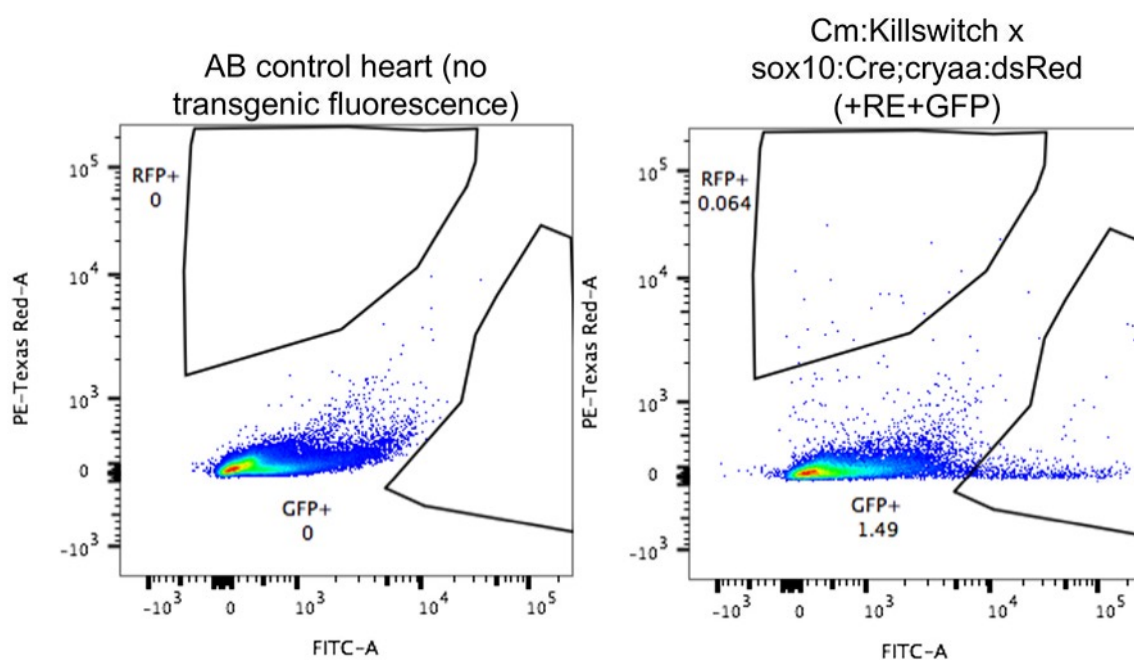

348

349 Extended Figure 6. Flow cytometry analysis and quantification of labeled cardiomyocytes in  
350 *Cm:KillSwitch x Tg(sox10:cre;cryaa:dsRed)* individual adult heart versus AB control. GFP and RFP  
351 gates were drawn based on non-transgenic/non-fluorescent AB wild-type hearts. Dissociated cells were  
352 gated on viability (DAPI) and singlets before analyzing GFP and RFP populations. Three individual  
353 hearts were similarly analyzed by flow cytometry to quantify numbers of GFP+ and RFP+  
354 cardiomyocytes. GFP+ and RFP+ percentages were added to quantify total number of cardiomyocytes in  
355 a whole heart and then RFP+ numbers were divided by this to generate their percent contribution to the



356 total adult cardiomyocyte population. The average values of these quantifications are listed in Figure  
 357 4A. Heart dissociation protocol was carried out as previously described<sup>28</sup>.

358

359 Extended Figure 7.

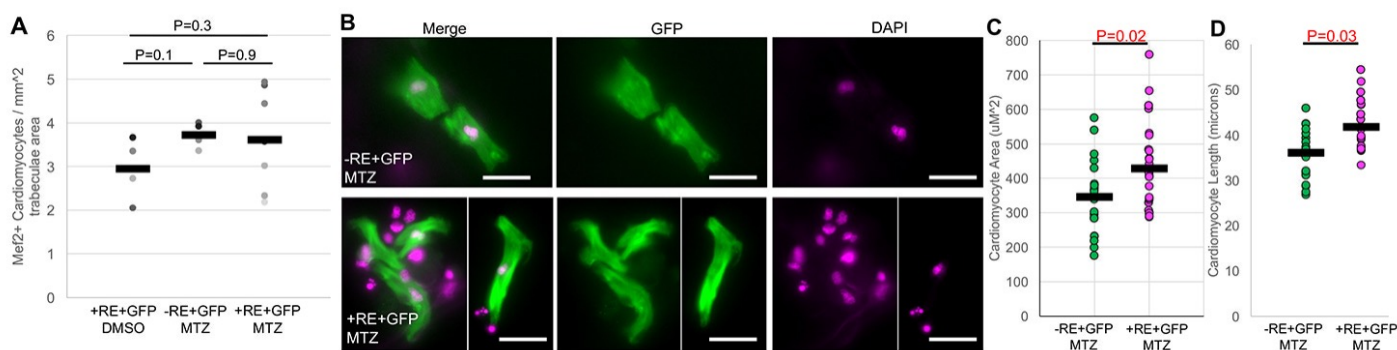

360

361 Extended Figure 7. Quantification of cardiomyocyte number and size in adult hearts. A) Cardiomyocyte

362 number per trabeculae area as quantified from microscopy section examples in Figure 4H-J. Dots

363 represent individual adult section measurements and bars the mean of each sample. P-values on from

364 two-sample standard T-tests. B) Examples of cardiomyocyte chamber cultures from NC-Cm ablated

365 (+RE+GFP, MTZ, bottom panel) and sibling control (-RE+GFP, MTZ, top panel). GFP and DAPI

366 staining of example cardiomyocytes from each sample. Note GFP negative, DAPI positive cells are

367 present in images and represent non-cardiomyocyte cells of the dissociated ventricle cell population.

368 Scale bar = 20µM. C) Quantification of individual cardiomyocyte area from chamber cultures as in

369 'B.' N ≥ 25 cells per sample. P-value from standard t-test. D) Quantification of individual cardiomyocyte

370 length from chamber cultures as in 'B.'

371

372

373

374

375 Extended Figure 8.

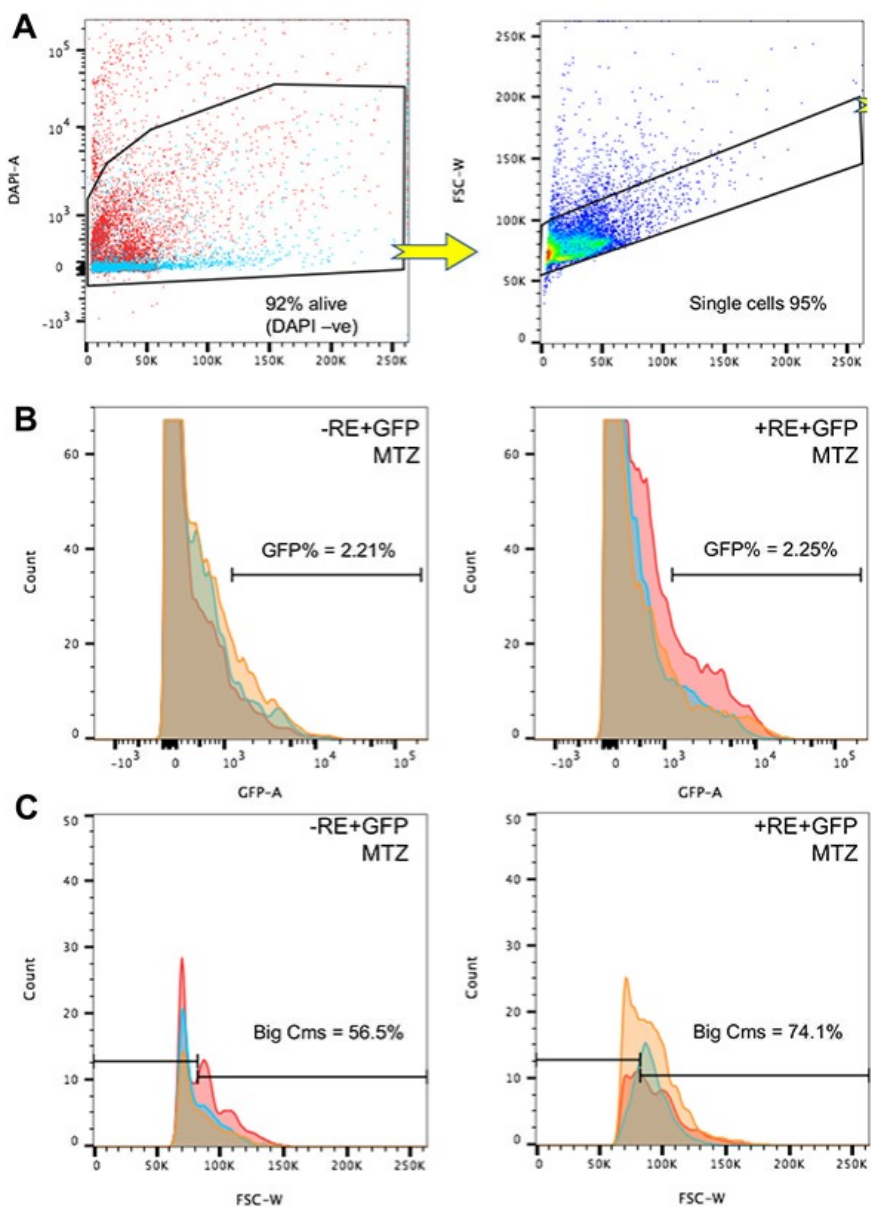

376

377 Extended Figure 8. Flow cytometry analysis of NC-Cm ablated and sibling control dissociated  
378 ventricles. A) Flow cytometry gating and analysis strategy for dissociate ventricle cells. Cells were first  
379 gated based on viability using DAPI staining, followed by selection for single cells as opposed to  
380 doublets based on the forward scatter width profile. Cells colored in blue represent the negative control  
381 for gating analysis, except for in the single cell gate. Percentages are averages of three or more

382 individual samples in the full experimental analysis. B) Cell populations from the single cell gate in  
383 panel A were analyzed for their percentage of GFP positive cells by histogram analysis and gating in the  
384 GFP channel, using the negative control sample to set the GFP+ gate. Percentages shown are averages  
385 from  $n \geq 3$  individual, dissociated ventricle analysis in each sample and were not significantly different  
386 ( $p=0.93$ , standard t-test, control = left and NC-Cm ablated = right). Colors in the histogram represent  
387 individuals in each sample analysis and overlaid onto a single plot. C) GFP positive cells as determined  
388 from gating analysis in panel B were then analyzed for their size spectrum using the forward scatter  
389 width channel. The number of cells in the larger forward scatter width profile was not as prominent in  
390 the NC-Cm ablated samples (right panel). Thus, a gate was created based on the control forward scatter  
391 width profile to quantify the amount of larger GFP positive cardiomyocytes ('Big Cm's' gate). A  
392 significantly increased proportion of large GFP+ cardiomyocytes were found in the NC-Cm ablated  
393 (+RE+GFP, MTZ) ventricle samples compared to control ( $p=0.009$ , standard t-test, percentages shown  
394 are averages of  $n \geq 3$  in each sample, colors represent individuals).

395

396 Extended Movie 1.

397 3D reconstruction of a 3dpf heart from a transgenic embryo of *sox10:cre;cryaa:dsRed* and  
398 *Cm:KillSwitch*. NC-Cms are labeled in magenta and all other CMs are labeled in green.

399

400 Extended Movie 2.

401 Example of an adult fish undergoing the swim trial test and collapsing to fatigue.

402

403 Methods:

404 Zebrafish were housed in accordance with IACUC policies. The AB genetic background was used for all  
405 experiments and lines generated.

406

#### 407 *Transgenic line generation*

408 The p5-entry clone for the 7.2 kb *sox10* promoter is described<sup>29</sup>. The *p5E-sox10* clone was used with  
409 zebrafish codon optimized Cre, called *pME-iCre*, *p3E-cryaa:dsRed* and *pDestpA* to generate a final  
410 construct, via Gateway LR recombination technology: *sox10:iCre;cryaa:dsRed*. To generate *myl7:loxP-*  
411 *eGFP-loxP-tRFP-2A-mNTR* (called *Cm:KillSwitch*), the *p5E-myl7*, *pME-floxedGFP*, *p3E-tRFP-2A-*  
412 *mNTR* and *pDestpA* were recombined with Gateway LR recombination. *P3E-tRFP-2A-mNTR* was  
413 generated by PCR isolation of the 2A-mNTR sequence from the plasmid *p3E-YFP-2A-mNTR* (gift of  
414 J.Mumm lab)<sup>30</sup>, followed by a fusion PCR with the tagRFP coding sequence. Final constructs were  
415 sequence verified and injected at 25-30ng/ul with 30ng of Tol2 mRNA into single cell stage AB  
416 embryos<sup>31</sup>. At least three founders were screened, verified for similar expression patterns of each  
417 transgene and outcrossed to AB adults to propagate the line. Heterozygotes for each transgene were used  
418 in all experiments described.

419

#### 420 *Transgenic line manipulation*

421 To ablate NC-Cms and demonstrate effectiveness/specificity of the *Cm:KillSwitch* line, different  
422 doses/incubation times of metronidazole (MTZ, Sigma cat. No. 46461) treatment were tested. Treatment  
423 of *sox10:Cre;cryaa:dsRed x Cm:KillSwitch* embryos with 5mM from 30hpf-48hpf was comparable, in  
424 terms of yield of NC-Cm cell death, to 10mM MTZ treatment from 48-56hpf. For all reported  
425 experiments MTZ treatment was then carried out at 5mM doses from 30hpf-48hpf. MTZ stock was  
426 resuspended in DMSO at 1M concentration followed by dilution in E3 embryo media to achieve the

427 correct dose (5 or 10mM). MTZ stock was stored at 4C in the dark but not used older than a week after  
428 resuspension. The MTZ treatment regimens tested resulted in increased, specific and detectable cell  
429 death immediately after treatment (Extended Figure 2).

430

#### 431 *Flow cytometry*

432 Adult ventricle or whole hearts were dissected out of anaesthetized fish and placed into cold HBSS +  
433 1%FBS media. Hearts or ventricles were then allowed to pump for a few minutes in order to release any  
434 blood and squeezed gently with forceps to remove blood. For analyzing only ventricles, the atrium and  
435 outflow tract were manually dissected away with forceps. Otherwise whole hearts or ventricles were cut  
436 into pieces and placed into Liberase DH (1mg/ml) containing HBSS + 1% FBS solution. They were then  
437 placed in a 28C shaking incubator to dissociate for ~15-20mins. Pipetting every 5 minutes was used to  
438 aid in dissociation. ~200uL of dissociation solution was used for 1-3 hearts. Dissociated samples were  
439 spun down at 2500 rpm for 5 mins, supernatant removed without disturbing the cell pellet and then  
440 resuspended with 350ul of HBSS + 1% FBS, placed on ice, incubated with DAPI for a viability analysis,  
441 and processed for flow cytometry analysis on a BD FACS Canto.

442

#### 443 *Immunofluorescence and Microscopy*

444 For endogenous transgenic fluorescence detection and imaging, embryos were incubated in E3 media  
445 with PTU addition to prevent pigment formation. Embryos were briefly treated with 0.5M KCl to relax  
446 hearts and then immediately fixed in 2%PFA+PBS for 1 hour at room temperature. Embryos were  
447 washed and mounted in low melt agarose for microscopy. 3D images were acquired on a Zeiss LSM 880  
448 under fast mode and 20X magnification.

449 Antibody staining for anti-active-caspase3 was done according to the published protocol<sup>32</sup>. Briefly  
450 Rabbit-anti-active-Caspase3 antibody was used (1:200, BD Pharmingen 559565) with Chicken anti-GFP  
451 (1:1000, Aves labs) in 4% PFA fixed embryos permeabilized with 100% cold methanol for 2 hours at -  
452 20C. Washes used PBS + 3% Tritonx100.

453 Antibody staining for Isl1/2 in the NC-Cm labelled embryos was carried out as described<sup>10</sup>. Embryos  
454 were fixed in 2% PFA+PIPES buffer and incubated with Rabbit anti-tRFP (1:200, Life technologies  
455 R10367.) and Chicken anti-GFP.

456 Antibody staining for MF20 (DSHB) was carried out as described<sup>33</sup>.

457 Antibody staining for Mef2 (Abcam 64644) on ventricle sections was carried out on 4% PFA+PBS,  
458 fixed adult hearts that were cryosectioned into 10uM sections. Sections were boiled in citrate buffer for  
459 ~40mins, washed with PBS + 0.3% Triton x100 (PBT), blocked with PBT + 5% goat serum, 1% DMSO  
460 and 5ug/ml BSA. Antibody staining was carried out at 1:200 in blocking solution overnight at 4C.  
461 Washes used PBT and secondary antibody staining utilized AlexaFluor 568 goat anti-rabbit (catalog no.)  
462 in blocking solution.

463 Chamber cultures of dissociated adult ventricles were carried out by dissociating pools of isolated  
464 ventricles similar to the flow cytometry protocol above. The resuspension was then distributed into a  
465 single chamber of a Lab-Tek 8-chamber, chamber slide and incubated for 24hrs at 28C to allow settling  
466 and adherence of cells. To fix cultured cells for microscopy, media was largely removed but never left  
467 completely dry and 4% PFA +PBS was added carefully to not disturb adherent cells and incubated for  
468 10mins. Chambers were washed in PBS and processed for staining with GFP antibody as in above  
469 methods.

470

471 *Image Analysis*

472 Imaris software (v8.4.1) was used to reconstruct 3D microscopy images and count cell numbers. Imaris  
473 “surfaces” was used to analyze the volume of NC-Cm contribution by generating a surface for the entire  
474 RFP channel and assessing the volume compared to the volume of the GFP channel + RFP channel  
475 (combined they were considered the whole Cm volume of the heart). The “clipping plane” feature of  
476 Imaris was used to view individual trabeculae in embryonic ventricles and generate angle measurements  
477 using the “measurement points” feature. Only ventricles with greater than 3 measurable angles were  
478 used for analysis.

479 Trabeculae angles and relative heart position data were gathered for embryonic ventricles from Imaris  
480 analysis. These data were input into R programming interface to compute a slope value for each heart  
481 measured. Slopes were computed using the ‘lm’ function (linear regression model) in R, on individual  
482 ventricle measurements. Individual heart data for angle by position measurements are displayed in  
483 Extended figure 5 along with their computed slope and regression value.

484 Measurements of trabeculation in adult ventricle sections were generated using Fiji software. GFP  
485 fluorescent images (GFP fluorescence due to Cm or trabeculae structures of the ventricle) of adult  
486 ventricle sections were thresholded for a uniform value of intensity and then applied across all samples.  
487 A uniform area selection was used across all section samples to generate the percent of ventricle area  
488 covered in GFP/trabeculae.

489 Fiji was used to quantify the number of Mef2+, DAPI+ nuclei within the adult ventricle trabeculae.  
490 Trabeculae were outlined and selected manually to create an ROI and Mef2+, GFP+ nuclei were  
491 counted within each ROI, followed by a measurement of the ROI area. The number of nuclei were  
492 divided by the area in millimeters squared to tabulate values graphed in Extended Figure 7A.

493 For analysis of cardiomyocyte size in chamber cultures of dissociated ventricles, Fiji, was used to  
494 manually outline the GFP+ cardiomyocyte images acquired by compound fluorescent microscopy. DAPI

495 was used to confirm a single cardiomyocyte was being analyzed and outlined for area measurements. To  
496 calculate length and width of cardiomyocytes the longest line was drawn from edge to edge length or  
497 width wise and then measured in micron units. Width measurements were not significant between NC-  
498 Cm ablated cardiomyocytes and sibling controls and area and length measurements are graphed in  
499 Extended Figure 7 C and D.

500

#### 501 *Swim trials*

502 A Loligo Systems swim tunnel setup was used to test individual adult males greater than 4 months of  
503 age for swim trial performance. Swim speeds in meters per second were based on calibrated instrument  
504 setting measurements. Incremental step sizes of 6 minutes and Ucrit values and measurements were  
505 calculated as described previously<sup>34</sup>. Fish were considered fatigued based on their inability to remove  
506 themselves from the mesh tunnel end for greater than 4 seconds. Body length normalization of Ucrit  
507 values was generated by measuring the length of the fish. Data shown are a compile of multiple  
508 biological replicates and sibling cohorts.

509

#### 510 *Quantitative PCR*

511 4dpf hearts were extracted from treated and control siblings from the *Cm:KillSwitch* cross to  
512 *Tg(sox10:Cre;cryaa:dsRed)* as described previously<sup>35</sup>. These hearts were immediately lysed in trizol and  
513 processed for RNA using a Zymo mini RNA kit. The total RNA was used for cDNA synthesis with  
514 BioRad iScript 5X master mix. Subsequent cDNA was used in multiplex qPCR reactions with the  
515 following gene primers: *rpl11*, *myl7*, *jag2B*, *erbb2*, *nrg2A*. Primer and probe sequences are listed in  
516 Extended data table 1. Delta Ct calculations were normalized to *rpl11* expression levels and control  
517 sibling expression levels.



518

519 *Statistics*

520 R graphic programming was used to generate the dot plots in Figure 2F, 3G and 3I. ANOVA tests were  
521 run on dot plot data in 2F, 3G and 3I to test significance.

522 Student T-tests were performed on qPCR data in 3B on delta Ct values from control and NC-Cm ablated  
523 heart expression values.

524

525 Extended data table 1. Primers and Probes used in qPCR.

|             |                                   |
|-------------|-----------------------------------|
| jag2b F     | TGC TCG CAT CAC CCT TAT TT        |
| jag2b R     | AGG TCA CAC AGA ACC AAC AG        |
| jag2b probe | CA CAG GAA CG ACG GTG GAG AAT GT  |
| erbb2 F     | GAG GAA TAC CTG GTA CCA CAA C     |
| erbb2 R     | AAA CCA TCC ACC TCT ACC ATT T     |
| erbb2 probe | AT GGA GAA AT GAG AGC CAA CGG GC  |
| nrg2a F     | GGC CAA TGG ACC CAA TCA           |
| nrg2a R     | TGC TCC GTG CCG AAT TAC           |
| nrg2a probe | TG GTC CTG AGG AGA TTC CCA TGG TA |
| myl7 F      | GCA CAG ACC CAG AGG AAA C         |
| myl7 R      | GGT CAT TAG CAG CCT CTT GAA       |
| myl7 probe  | CG ACC CTA AT GCC ACA GGA GTT GT  |
| Rpl11 F     | CATTGGAATCTACGGATTGGA             |
| Rpl11 R     | TGATGCCGTCATACTTCTGC              |
| Rpl11 probe | CCGGTTCAGCATTGCTGACAAA            |

526

527

528 References:

- 529 1. Meulemans, D. & Bronner-Fraser, M. Gene-Regulatory Interactions in Neural Crest Evolution  
530 and Development. *Dev. Cell* **7**, 291–299 (2004).
- 531 2. Sato, M. & Yost, H. J. Cardiac neural crest contributes to cardiomyogenesis in zebrafish. *Dev.*  
532 *Biol.* **257**, 127–139 (2003).
- 533 3. Li, Y.-X. *et al.* Cardiac neural crest in zebrafish embryos contributes to myocardial cell lineage  
534 and early heart function. *Dev. Dyn.* **226**, 540–550 (2003).
- 535 4. Keyte, A. & Hutson, M. R. The neural crest in cardiac congenital anomalies. *Differentiation* **84**,  
536 25–40 (2012).
- 537 5. Cavanaugh, A. M., Huang, J. & Chen, J. N. Two developmentally distinct populations of neural  
538 crest cells contribute to the zebrafish heart. *Dev. Biol.* **404**, 103–112 (2015).
- 539 6. Ma, P. *et al.* Cardiac neural crest ablation results in early endocardial cushion and hemodynamic  
540 flow abnormalities. *Am. J. Physiol. Heart Circ. Physiol.* **311**, H1150–H1159 (2016).
- 541 7. Holler, K. L. *et al.* Targeted deletion of Hand2 in cardiac neural crest-derived cells influences  
542 cardiac gene expression and outflow tract development. *Dev. Biol.* **341**, 291–304 (2010).
- 543 8. Li, Y. X. *et al.* Cardiac neural crest in zebrafish embryos contributes to myocardial cell lineage  
544 and early heart function. *Dev. Dyn.* **226**, 540–550 (2003).
- 545 9. Choi, W.-Y. *et al.* <em>In vivo</em> monitoring of cardiomyocyte proliferation to  
546 identify chemical modifiers of heart regeneration. *Development* **140**, 660 LP-666 (2013).
- 547 10. Witzel, H. R., Cheedipudi, S., Gao, R., Stainier, D. Y. R. & Dobрева, G. D. Isl2b regulates  
548 anterior second heart field development in zebrafish. *Sci. Rep.* **7**, 41043 (2017).

- 549 11. Carney, T. J. *et al.* A direct role for Sox10 in specification of neural crest-derived sensory  
550 neurons. *Development* **133**, 4619–4630 (2006).
- 551 12. Garrity, D. M., Childs, S. & Fishman, M. C. The heartstrings mutation in zebrafish causes  
552 heart/fin Tbx5 deficiency syndrome. *Development* **129**, 4635–45 (2002).
- 553 13. Han, P. *et al.* Coordinating cardiomyocyte interactions to direct ventricular chamber  
554 morphogenesis. *Nature* **534**, 700–704 (2016).
- 555 14. Parsons, M. J. *et al.* Notch-responsive cells initiate the secondary transition in larval zebrafish  
556 pancreas. *Mech. Dev.* **126**, 898–912 (2009).
- 557 15. Rasouli, S. J. & Stainier, D. Y. R. Regulation of cardiomyocyte behavior in zebrafish  
558 trabeculation by Neuregulin 2a signaling. *Nat. Commun.* **8**, 15281 (2017).
- 559 16. Liu, J. *et al.* A dual role for ErbB2 signaling in cardiac trabeculation. *Development* **137**, 3867–75  
560 (2010).
- 561 17. Finsterer, J., Stöllberger, C. & Towbin, J. A. Left ventricular noncompaction cardiomyopathy:  
562 cardiac, neuromuscular, and genetic factors. *Nat. Rev. Cardiol.* **14**, 224–237 (2017).
- 563 18. Harvey, P. A. & Leinwand, L. A. The cell biology of disease: cellular mechanisms of  
564 cardiomyopathy. *J. Cell Biol.* **194**, 355–65 (2011).
- 565 19. Zhang, R. *et al.* In vivo cardiac reprogramming contributes to zebrafish heart regeneration.  
566 *Nature* **498**, 497–501 (2013).
- 567 20. Matrone, G. *et al.* Laser-targeted ablation of the zebrafish embryonic ventricle: a novel model of  
568 cardiac injury and repair. *Int. J. Cardiol.* **168**, 3913–9 (2013).
- 569 21. Porras, D. & Brown, C. B. Temporal–spatial ablation of neural crest in the mouse results in  
570 cardiovascular defects. *Dev. Dyn.* **237**, 153–162 (2008).
- 571 22. Tomita, Y. *et al.* Cardiac neural crest cells contribute to the dormant multipotent stem cell in the

- 572 mammalian heart. *J. Cell Biol.* **170**, 1135–46 (2005).
- 573 23. Hatzistergos, K. E. *et al.* *cKit*<sup>+</sup> cardiac progenitors of neural crest origin. *Proc. Natl. Acad. Sci.*  
574 **112**, 201517201 (2015).
- 575 24. Tamura, Y. *et al.* Neural crest-derived stem cells migrate and differentiate into cardiomyocytes  
576 after myocardial infarction. *Arterioscler. Thromb. Vasc. Biol.* **31**, 582–9 (2011).
- 577 25. Faienza, M. F., Giordani, L., Ferraris, M., Bona, G. & Cavallo, L. PTPN11 Gene Mutation and  
578 Severe Neonatal Hypertrophic Cardiomyopathy: What Is the Link? *Pediatr. Cardiol.* **30**, 1012–  
579 1015 (2009).
- 580 26. Konno, T., Chang, S., Seidman, J. G. & Seidman, C. E. Genetics of hypertrophic  
581 cardiomyopathy. *Curr. Opin. Cardiol.* **25**, 205–209 (2010).
- 582 27. Tessadori, F. *et al.* Identification and Functional Characterization of Cardiac Pacemaker Cells in  
583 Zebrafish. *PLoS One* **7**, e47644 (2012).
- 584 28. Sander, V., Suñe, G., Jopling, C., Morera, C. & Belmonte, J. C. I. Isolation and in vitro culture of  
585 primary cardiomyocytes from adult zebrafish hearts. *Nat. Protoc.* **8**, 800–809 (2013).
- 586 29. Dutton, J. R. *et al.* An evolutionarily conserved intronic region controls the spatiotemporal  
587 expression of the transcription factor Sox10. *BMC Dev. Biol.* **8**, 105 (2008).
- 588 30. Mathias, J. R., Zhang, Z., Saxena, M. T. & Mumm, J. S. Enhanced cell-specific ablation in  
589 zebrafish using a triple mutant of *Escherichia coli* nitroreductase. *Zebrafish* **11**, 85–97 (2014).
- 590 31. Kwan, K. M. *et al.* The Tol2kit: A multisite gateway-based construction kit for Tol2 transposon  
591 transgenesis constructs. *Dev. Dyn.* **236**, 3088–3099 (2007).
- 592 32. Sorrells, S., Toruno, C., Stewart, R. A. & Jette, C. Analysis of apoptosis in zebrafish embryos by  
593 whole-mount immunofluorescence to detect activated Caspase 3. *J. Vis. Exp.* e51060 (2013).  
594 doi:10.3791/51060

- 595 33. Berdougo, E., Coleman, H., Lee, D. H., Stainier, D. Y. R. & Yelon, D. Mutation of weak  
596 atrium/atrial myosin heavy chain disrupts atrial function and influences ventricular  
597 morphogenesis in zebrafish. *Development* **130**, 6121–9 (2003).
- 598 34. Tierney, K. B. Swimming Performance Assessment in Fishes. *J. Vis. Exp.* e2572–e2572 (2011).  
599 doi:10.3791/2572
- 600 35. Lombardo, V. A., Otten, C. & Abdelilah-Seyfried, S. Large-scale Zebrafish Embryonic Heart  
601 Dissection for Transcriptional Analysis. *J. Vis. Exp.* 52087 (2015). doi:10.3791/52087  
602

603 Acknowledgements:

604 We gratefully acknowledge Dr. Jerald Johnson, BYU, for lending us a swim tunnel for these studies. We  
605 thank Dr. Jeffrey Mumm and Dr. Kristen Kwan for providing reagents. We thank Dr. Maureen Condic,  
606 Dr. Rodney Stewart, Dr. Marti Tristani for their review of this manuscript, and Yost lab members for  
607 discussions. This study was funded by a NHLBI Bench-to-Bassinet Consortium  
608 (<http://www.benchtobassinet.com>) grant to HJY (UM1HL098160). SAW was supported by National  
609 Institutes of Health under Ruth L. Kirschstein National Research Service Award 2T32HL007576-31  
610 from the National Heart, Lung, and Blood Institute.

611 Author contributions:

612 SAW conceived, designed and conducted the experiments with input from HJY. HJY and SAW wrote  
613 the manuscript. BLD carried out statistical analysis and graphical presentation of data.
